# Supplementary material for: Phosphorylation of the multifunctional signal transducer B-cell adaptor protein (BCAP) promotes recruitment of multiple SH2/SH3 proteins including GRB2
Source: PubMed Central journal article supplement (PMC6937578; doi:10.1074/jbc.ra119.009931), 2019-09-16
Supplement: supp_RA119.009931_153607_1_supp_393923_pxq5yp.pdf [file supp_RA119.009931_153607_1_supp_393923_pxq5yp.pdf]

## SUPPORTING INFORMATION

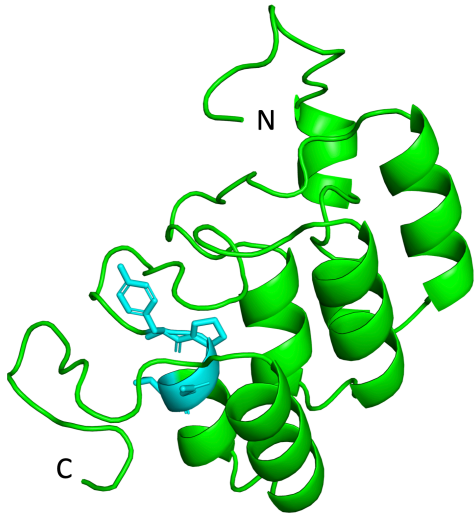

**Supplementary Figure 1. The 374YPNT motif is buried in the BCAP ANK domain.**

Structural model of the BCAP ANK domain generated by the Phyre2 prediction server. Tyrosine 374 and the remaining residues of the 374YPNT motif are highlighted in teal and represented as sticks.

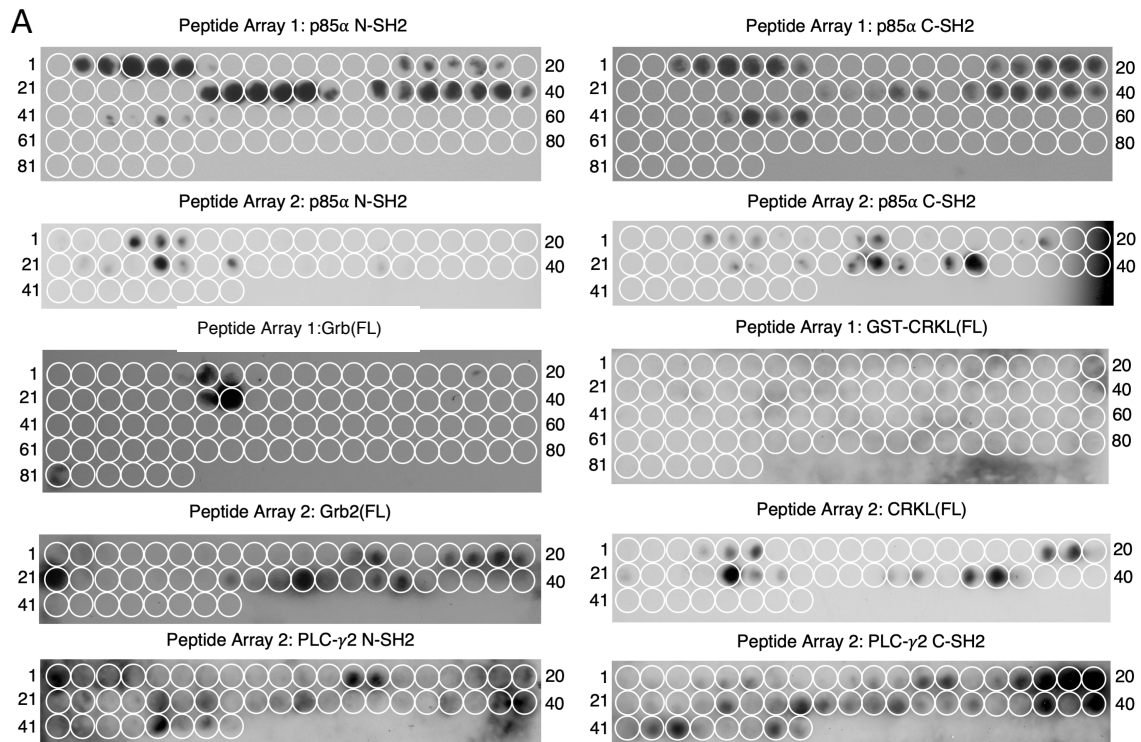

**B Peptide Array 1**

|                       |                       |                       |                     |
|-----------------------|-----------------------|-----------------------|---------------------|
| 1 KHGFRDLRQFIDE-pY-V  | 23 LSTDLLMKCSLNPGC    | 45 ETVISY-pY-TDMEEIGN | 67 LNPGCDEDLYESMAA  |
| 2 GFRDLRQFIDE-pY-VET  | 24 TDLLMKCSLNPGCDE    | 46 VCETVISY-pY-TDMEEI | 68 PGCEDELYESMAAFV  |
| 3 RDLRQFIDE-pY-VETVD  | 25 LLMKCSLNPGCDEDL    | 47 SY-pY-TDMEEIGNLLSN | 69 CDEDLYESMAAFVPA  |
| 4 LRQFIDE-pY-VETVDML  | 26 MKCSLNPGCDEDL-pY-E | 48 -pY-YTDMEEIGNLLSNA | 70 EDLYESMAAFVPAAT  |
| 5 QFIDE-pY-VETVDMLKS  | 27 CSLNPGCDEDL-pY-ESM | 49 DMEEIGNLLSNAANP    | 71 LYESMAAFVPAATED  |
| 6 IDE-pY-VETVDMLKSHI  | 28 LNPGCDEDL-pY-ESMAA | 50 KHGFRDLRQFIDEYV    | 72 ESMAAFVPAATEDLY  |
| 7 E-pY-VETVDMLKSHIKE  | 29 PGCEDEL-pY-ESMAAFV | 51 GFRDLRQFIDEYVET    | 73 MAAFVPAATEDLYVE  |
| 8 VETVDMLKSHIKEEL     | 30 CDEDL-pY-ESMAAFVPA | 52 RDLRQFIDEYVETVD    | 74 AFVPAATEDLYVEML  |
| 9 TVDMLKSHIKEELMH     | 31 EDL-pY-ESMAAFVPAAT | 53 LRQFIDEYVETVDML    | 75 VPAATEDLYVEMLQA  |
| 10 DMLKSHIKEELMHGE    | 32 L-pY-ESMAAFVPAATED | 54 QFIDEYVETVDMLKS    | 76 AATEDLYVEMLQAST  |
| 11 LKSHIKEELMHGEEA    | 33 ESMAAFVPAATEDL-pY- | 55 IDEYVETVDMLKSHI    | 77 TEDLYVEMLQASTSN  |
| 12 SHIKEELMHGEEADA    | 34 MAAFVPAATEDL-pY-VE | 56 EYVETVDMLKSHIKE    | 78 DLYVEMLQASTSNPI  |
| 13 IKEELMHGEEADAV-pY- | 35 AFVPAATEDL-pY-VEML | 57 IKEELMHGEEADAVY    | 79 YVEMLQASTSNPIPG  |
| 14 EELMHGEEADAV-pY-ES | 36 VPAATEDL-pY-VEMLQA | 58 EELMHGEEADAVYES    | 80 GDLVVCEYVETVDME  |
| 15 LMHGEEADAV-pY-ESMA | 37 AATEDL-pY-VEMLQAST | 59 LMHGEEADAVYESMA    | 81 LVVCEYVETVDMEI   |
| 16 HGEEADAV-pY-ESMAHL | 38 TEDL-pY-VEMLQASTSN | 60 HGEEADAVYESMAHL    | 82 VCETVISYVETVDMEI |
| 17 EADAV-pY-ESMAHLST  | 39 DL-pY-VEMLQASTSNPI | 61 EADAVYESMAHLST     | 83 ETVISYVETVDMEIGN |
| 18 ADAV-pY-ESMAHLSTDL | 40 -pY-VEMLQASTSNPIPG | 62 ADAVYESMAHLSTDL    | 84 VISYVETVDMEIGNLL |
| 19 AV-pY-ESMAHLSTDLLM | 41 EMLQASTSNPIPGDG    | 63 AVYESMAHLSTDLLM    | 85 SYVETVDMEIGNLLSN |
| 20 -pY-ESMAHLSTDLLMKC | 42 GDLVVCEYVETVDMEI   | 64 YESMAHLSTDLLMKC    | 86 YVETVDMEIGNLLSNA |
| 21 SMAHLSTDLLMKCSL    | 43 LVVCEYVETVDMEI     | 65 MKCSLNPGCDEDLYE    |                     |
| 22 AHLSTDLLMKCSLNP    | 44 VCETVISY-pY-TDMEEI | 66 CSLNPGCDEDLYESM    |                     |

**Peptide Array 2**

|                       |                        |                       |                       |
|-----------------------|------------------------|-----------------------|-----------------------|
| 1 IRCGAETTV-pY-VIVRC  | 13 PTLHFHFAAK-pY-GLKNL | 25 AHQLPDNEP-pY-IFKVF | 37 GAETTVYVIVRCKLD    |
| 2 GAETTV-pY-VIVRCKLD  | 14 HFAAK-pY-GLKNLTALL  | 26 LPDNEP-pY-IFKVFAEK | 38 KVENEYTVISVAPKNL   |
| 3 TV-pY-VIVRCKLDDRVA  | 15 AK-pY-GLKNLTALLTC   | 27 EP-pY-IFKVFAEKSQER | 39 NVSLKIYSGDLVVCE    |
| 4 RMEAKVENE-pY-TISVK  | 16 LTCPGALQA-pY-SVANK  | 28 KQERPGNF-pY-VSSES  | 40 AFKIVPYNTETLDKL    |
| 5 KVENE-pY-TISVKAPNL  | 17 PGALQA-pY-SVANKHGH  | 29 ERPGNF-pY-VSSESIRK | 41 HFAAKYGLKNLTALL    |
| 6 NE-pY-TISVKAPNLSSG  | 18 QA-pY-SVANKHGHYPNT  | 30 NF-pY-VSSESIRKGGPV | 42 PGALQAYSVANKHGH    |
| 7 SSGNVSLKI-pY-SGDLV  | 19 YSVANKHGH-pY-PNTIA  | 31 WRDRPQSSI-pY-DPFAG | 43 ANKHGHYPNTIAEKH    |
| 8 NVSLKI-pY-SGDLVVCE  | 20 ANKHGH-pY-PNTIAEKH  | 32 RPQSSI-pY-DPFAGMKT | 44 GQEEVYHTVDDDEA     |
| 9 KI-pY-SGDLVVCEYVET  | 21 GH-pY-PNTIAEKHGFDR  | 33 SI-pY-DPFAGMKTPGQR | 45 LPDNEPYPYIFKVFAEK  |
| 10 MCQAFKIVP-pY-NTETL | 22 CHLGQEEVD-pY-HTVDD  | 34 LPAKVEFGV-pY-ESGPR | 46 ERPGNFYVSSSESIRK   |
| 11 AFKIVP-pY-NTETLDKL | 23 GQEEVD-pY-HTVDDDEA  | 35 KVEFGV-pY-ESGPRKSV | 47 RPQSSIYDPFAGMKT    |
| 12 VP-pY-NTETLDKLLTES | 24 DV-pY-HTVDDDEAFSVD  | 36 GV-pY-ESGPRKSVIPPR | 48 KVEFGVYVSSSESIRKSV |

**Supplementary Figure 2. Complete BCAP binding profiles of the p85, Grb2, CRKL and PLC-γ2 SH2 domains.**

(A) Peptide arrays were incubated with GST-tagged SH2 domains as indicated. Protein binding was visualised by immunoblotting. (B) Sequence overview of peptide arrays used in (A). For completeness this representation includes repeats of arrays showing interaction of p85 SH2 domains presented in Figure 5A.

**Supplementary Table 1. KinasePhos CSNK2 prediction BCAP of phosphorylation.**

| Position | Target Residue | Kinase | Sequence           | SVM score |
|----------|----------------|--------|--------------------|-----------|
| 52       | S              | CSNK2  | GPEA <b>S</b> FSAE | 0.562     |
| 54       | S              | CSNK2  | EAS <b>F</b> SAEDL | 0.879     |
| 72       | S              | CSNK2  | VVLL <b>S</b> AELV | 0.549     |
| 149      | S              | CSNK2  | SGCD <b>S</b> VTDT | 0.586     |
| 213      | S              | CSNK2  | EAE <b>F</b> SPEDS | 0.887     |
| 592      | S              | CSNK2  | RPQ <b>S</b> SIYDP | 0.730     |
| 720      | S              | CSNK2  | TD <b>S</b> TSTAS  | 0.653     |
| 740      | S              | CSNK2  | LSV <b>S</b> SGMEG | 0.895     |

**Supplementary Table 2. Overview of constructs**

| Construct                       | Domain boundaries | Cloning method    | Template           | Vector             |
|---------------------------------|-------------------|-------------------|--------------------|--------------------|
| Grb2 SH2                        | 86-179            | LIC               | pGEX Grb2          | pMCSG10            |
| FLAG-Grb2                       | 1-217             | HindIII and XhoI  | pGEX Grb2          | pcDNA3.1(+)        |
| FLAG-CRKL                       | 2-303             | BamHI and XhoI    | pGEX-2T CRKL       | pcDNA3.1(+)        |
| p85 N-SH2                       | 359-478           | LIC               | Myc-p85 $\alpha$   | pMCSG10            |
| p85 C-SH2                       | 652-758           | LIC               | Myc-p85 $\alpha$   | pMCSG10            |
| p85 SH3                         | 39-121            | LIC               | Myc-p85 $\alpha$   | pMCSG10            |
| PLC- $\gamma$ 2 N-SH2           | 534-634           | LIC               | PLC- $\gamma$ 2-V5 | pMCSG10            |
| PLC- $\gamma$ 2 C-SH2           | 649-734           | LIC               | PLC- $\gamma$ 2-V5 | pMCSG10            |
| PLC- $\gamma$ 2 SH3             | 769-829           | LIC               | PLC- $\gamma$ 2-V5 | pMCSG10            |
| Myc-BCAP Y374F                  | 1-805             | SDM               | Myc-BCAP           | pcDNA3.1(+)        |
| His-Avi-TEV <sub>cl</sub> -BCAP | 2-805             | HindIII and BamHI | Myc-BCAP           | pcDNA3.1(+)        |
| pMET7-GAG-BCAP                  | 1-805             | EcoRI and XbaI    | Myc-BCAP           | pMET7-GAG-PQS1-RAS |
